# Supplementary material for: Future Perspectives of Ectopic Pregnancy Treatment—Review of Possible Pharmacological Methods
Source: MDPI journal article supplement (doi:10.3390/ijerph192114230), 2022-10-31

#### Supplementary materials:

##### Materials and methods

A literature search was carried out in the PubMed, Google Scholar and Scopus databases between November 2021 and October 2022. We used the combination of terms concerning ectopic pregnancy including “ectopic pregnancy”, “tubal ectopic pregnancy”, “interstitial ectopic pregnancy” or “caesarean scar ectopic pregnancy” with the following search terms: “treatment”, “medical treatment”, “new treatment options”, “methotrexate”, “MTX”, “aromatase inhibitors”, “letrozole”, “gefitinib”, “absolute ethanol”, “KCl” and “potassium chloride”. All combinations of terms used in the article selection process were listed in the following table.

| FIRST COMPONENT OF THE SEARCHED TERMS | SECOND COMPONENT OF THE SEARCHED TERMS |
|---------------------------------------|----------------------------------------|
| ectopic pregnancy                     | treatment                              |
| tubal ectopic pregnancy               | medical treatment                      |
| interstitial ectopic pregnancy        | new treatment options                  |
| caesarean scar ectopic pregnancy      | methotrexate                           |
|                                       | MTX                                    |
|                                       | aromatase inhibitors                   |
|                                       | letrozole                              |
|                                       | gefitinib                              |
|                                       | absolute ethanol                       |
|                                       | KCl                                    |
|                                       | potassium chloride                     |

##### Inclusion criteria:

- no limitations of the year of published study were applied
- types of studies?
- study cases

##### Exclusion criteria:

- articles not written in English
- conference abstracts only
- duplicated papers

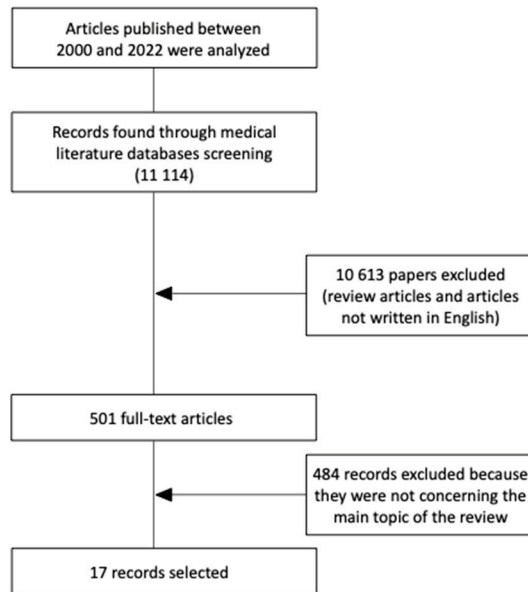

Supplement: s1 [file s1]
